# Supplementary material for: Leptin modulates autophagy in human CD4+CD25− conventional T cells
Source: PubMed Central journal article supplement — Metabolism. 2014 Oct;63(10):1272–9. doi: 10.1016/j.metabol.2014.06.010 (PMC4180014; doi:10.1016/j.metabol.2014.06.010), 2014-10
Supplement: mmc1.pdf [file mmc1.pdf]

**A**

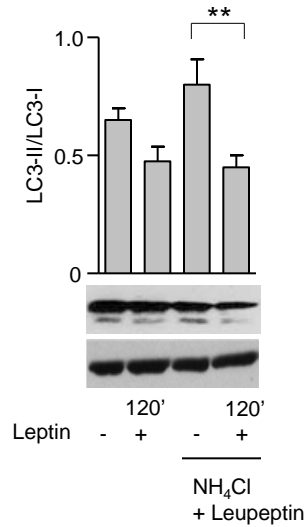

### Supplemental Fig.1 Leptin specifically reduces autophagy in BAF/3-hLepRb<sup>+</sup> cells

Densitometric analysis of LC3-II/LC3-I in BAF/3-hLepRb<sup>+</sup> cells. Cells were stimulated or not with leptin (100 ng/ml), in presence or absence of lysosomal protease inhibitors NH<sub>4</sub>Cl (20 mM) and leupeptin (100 μM). LC3-II was also normalized against actin. Densitometric analysis represents the mean ± S.E.M. of at least three experiments one representative out of three independent experiments (\*\*  $p < 0.03$ ).
