# Supplementary material for: Leptin modulates autophagy in human CD4+CD25− conventional T cells
Source: PubMed Central journal article supplement — Metabolism. 2014 Oct;63(10):1272–9. doi: 10.1016/j.metabol.2014.06.010 (PMC4180014; doi:10.1016/j.metabol.2014.06.010), 2014-10
Supplement: mmc2.pdf [file mmc2.pdf]

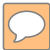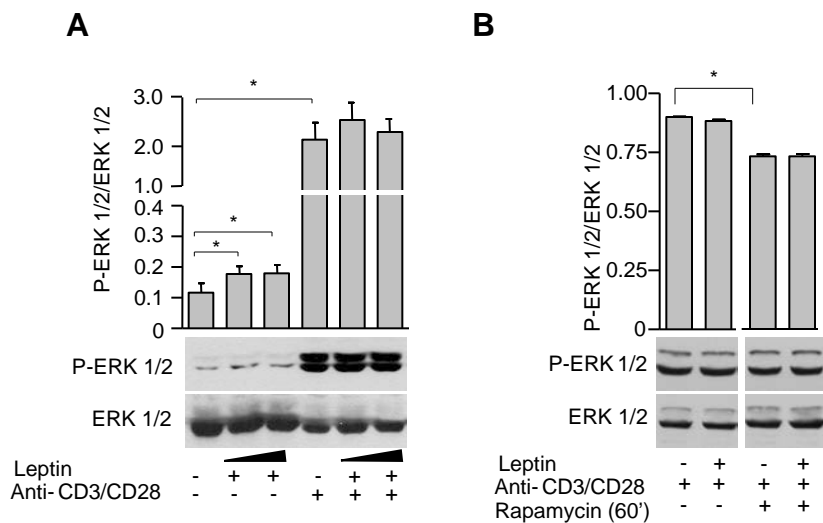

**Supplemental Fig.2 P-ERK1/2 levels in Tconv cells upon leptin stimulation in basal conditions and upon TCR-stimulation.**

Densitometric analysis P-ERK1/2/ERK1/2 in human Tconv cells stimulated for 120' with increasing human leptin concentrations (100-200 ng/ml) plus anti-CD3/CD28 (0,2 beads/cell) (A) and in presence or not of rapamycin (60' at 100 nM) (B). Representative of at least three independent experiments. Data are shown as mean  $\pm$  S.E.M. (\*  $p < 0.05$ ).
